# Supplementary material for: Single cell meta-analysis of EndMT and EMT state in COVID-19
Source: PubMed Central journal article supplement (PMC9558222; doi:10.3389/fimmu.2022.976512), 2022-09-29
Supplement: DataSheet_1.pdf [file DataSheet_1.pdf]

## Figure 1: Quality control (QC) of each dataset

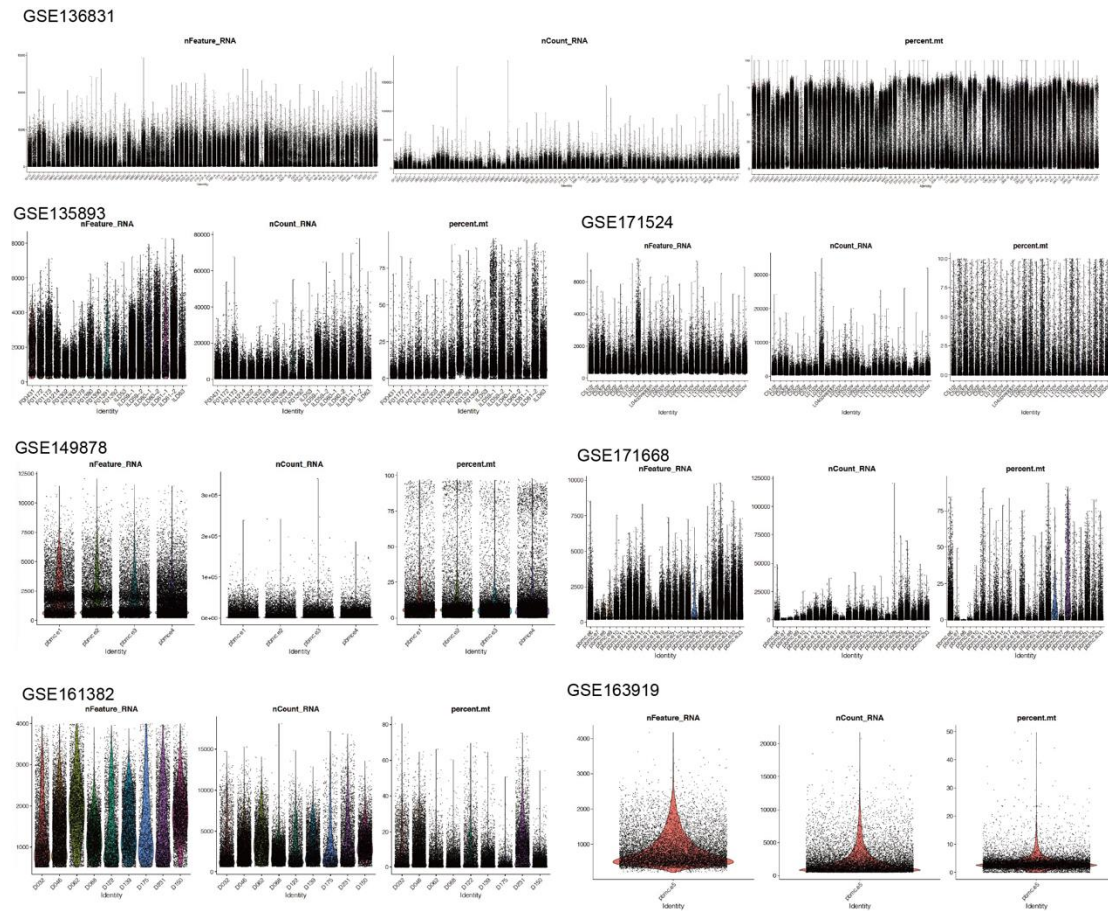

Figure 1: Quality control (QC) of each dataset. Scatterplot illustrating the number of genes, RNA molecules (UMIs) and the percentage of mitochondrial genes in each cell of the lung samples.

## Figure 2: Batch effect correction

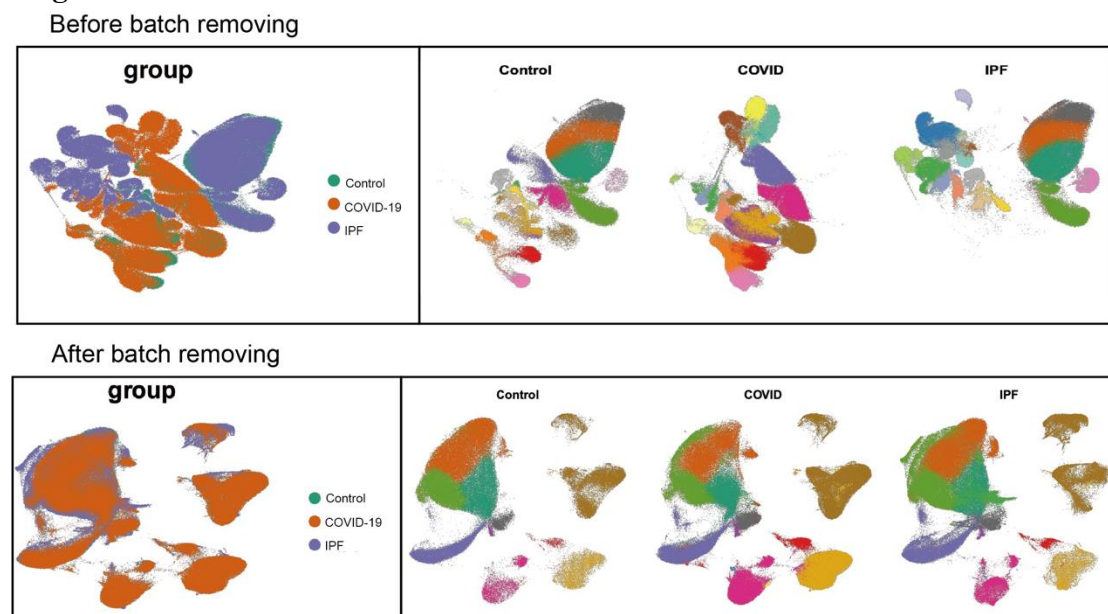

sFigure2: UMAP visualization before and after batch correction. The separation of batches is clearly visible before batch correction and less visible afterwards. Batch correction was performed using Harmony.

**sFigure3: The markers of early and late MT**

**EMT markers**

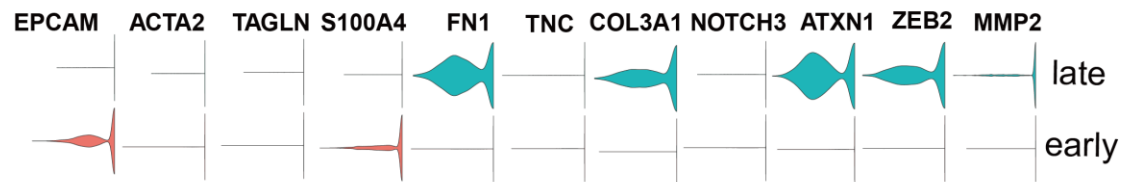

**EndMT markers**

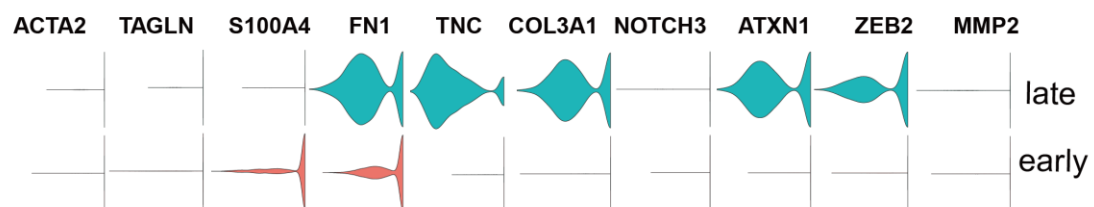

sFigure3: Violin diagram shows the marker genes of early and late MT. early-stage MT mainly focusing on ACTA2, TAGLN, S100A4. late-stage MT mainly focusing on FN1, TNC, COL3A1, NOTCH3, ATXN1, ZEB2, MMP2.

**sFigure4: Expression of each cell subset marker gene in all cell subsets**

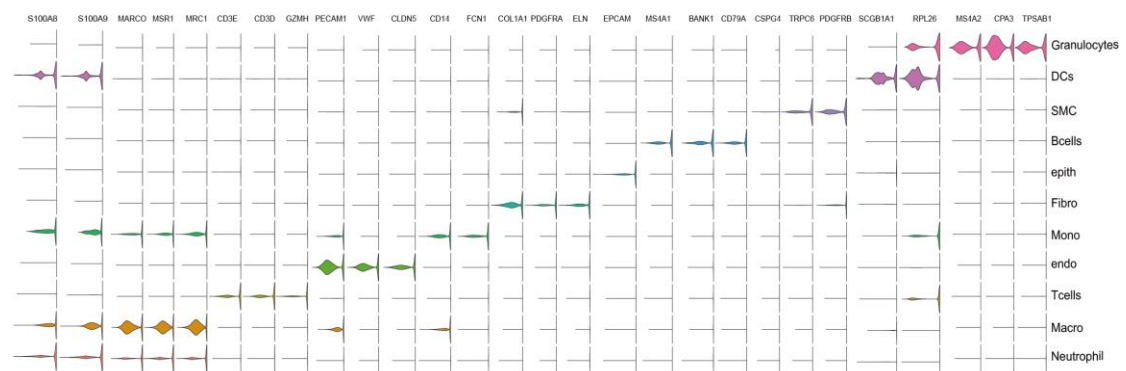

sFigure4: Violin diagram shows expression of each cell subset marker gene in all cell subsets: Endothelial cells (endo): PECAM1, VWF, CLDN5; Macrophages(Macro): MARCO, MSR1, MRC1; Tcells: CD3E, CD3D, GZMH; Granulocytes: MS4A2, CPA3, TPSAB1; Bcells: MS4A1, BANK1, CD79A; Monocytes(Mono): CD14, FCN1; Neutrophil: S100A8, S100A9; Epithelial cells(epith): EPCAM; Fibroblast(Fibro): COL1A1, PDGFRA, ELN; SMC: SCGB1A1, RPL26.
